# Supplementary material
Source: publisher figshare collection journal article supplement (https://gsajournals.figshare.com/ndownloader/files/25833959)
Supplement: Supplementary file 1 [file 25833959]

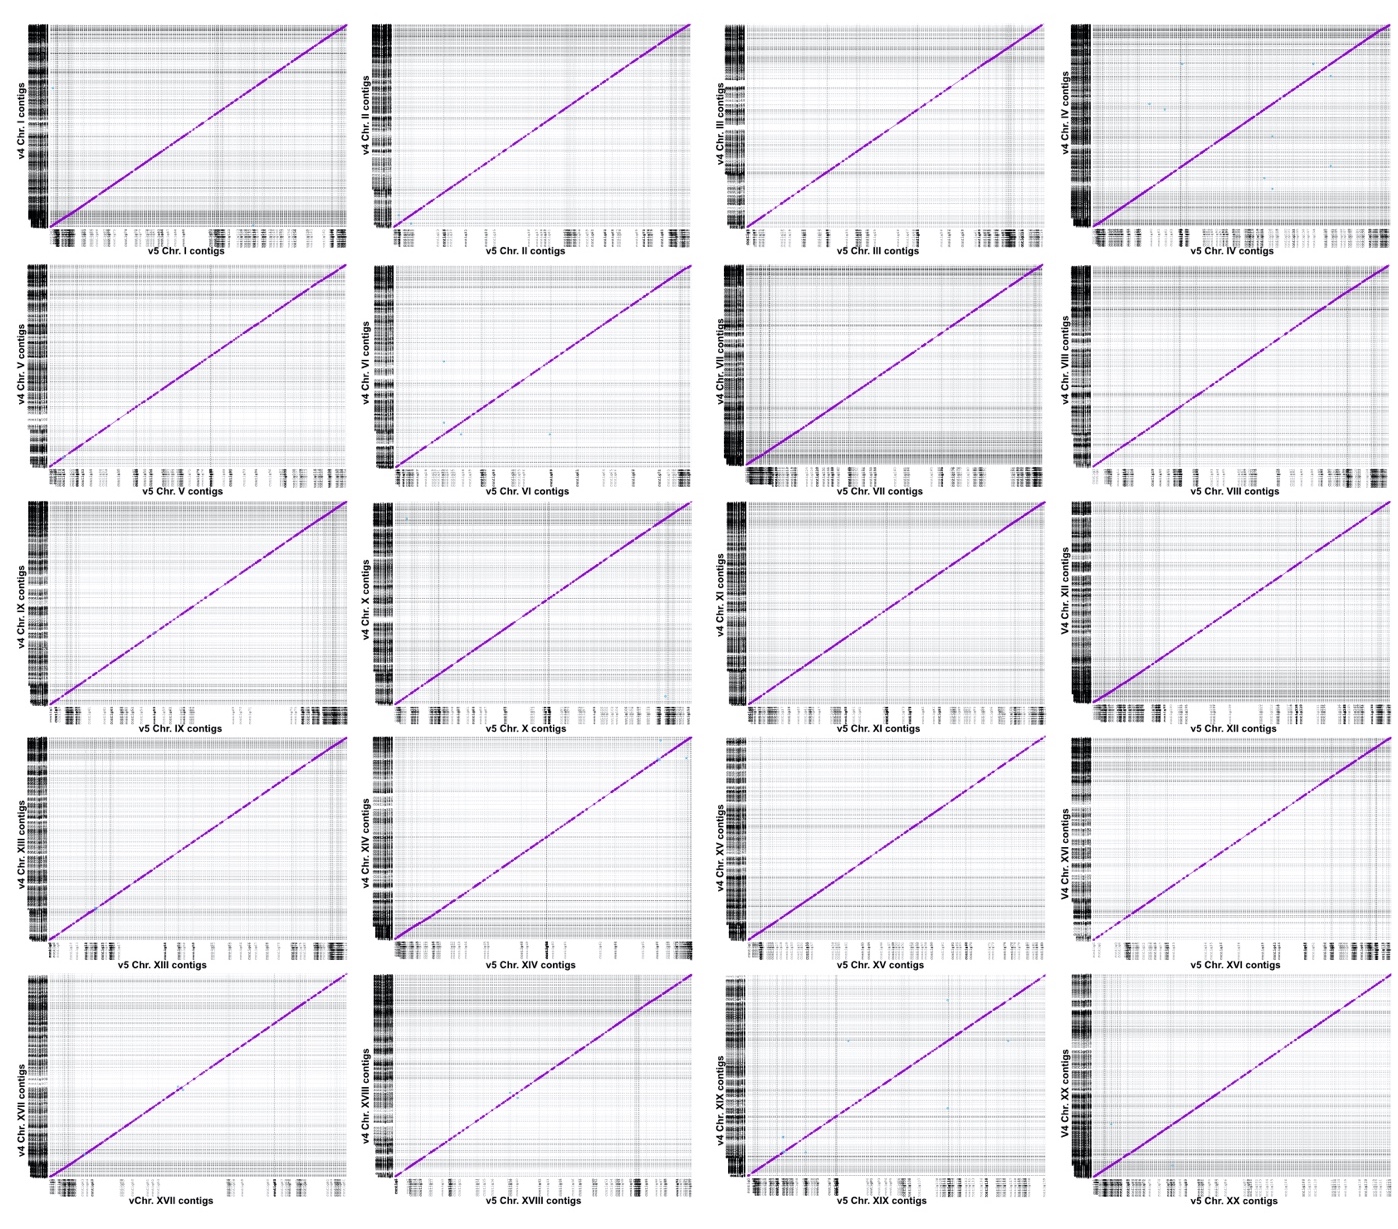


**Figure S5.** The v. 4 reference assembly and the v. 5 reference assembly are collinear. There are fewer contigs in the v. 5 assembly, revealing a more contiguous assembly across all chromosomes. Chromosomes in the v. 4 assembly were broken at N’s into individual contigs and aligned to the contigs in the v. 5 reference assembly using nucmer.
